# Supplementary material for: Construction of light-sensitive Cu2O/Fe2O3 heterostructures to promote photocatalytic CO2 reduction and photo-assisted charge storage
Source: Royal Society of Chemistry journal article supplement (doi:10.1039/d4se01038h), 2024-01-01
Supplement: d4se01038h1.pdf [file d4se01038h1.pdf]

## Supplementary information

### Construction of light-sensitive $\text{Cu}_2\text{O}/\text{Fe}_2\text{O}_3$ heterostructures to promote photocatalytic $\text{CO}_2$ reduction and photo-assisted charge storage

Xiankui Lv,<sup>a</sup> Hongran Yang,<sup>a</sup> Weiting Meng,<sup>a</sup> Muhammad Arif,<sup>a</sup>

Xiaobo Feng,<sup>ab</sup> Weibin Zhang,<sup>\*ab</sup> and Ting Zhu<sup>\*ab</sup>

<sup>a</sup> School of Physics and Electronic Information, Yunnan Normal University, 768 Juxian Street, Kunming 650500, China.

<sup>b</sup> Yunnan Key Laboratory of Optoelectronic Information Technology, School of Physics and Electronic Information, Yunnan Normal University, Kunming 650500, China.

\*Emails: [220001@ynnu.edu.cn](mailto:220001@ynnu.edu.cn) (W. B. Zhang); [zhut0002@ynnu.edu.cn](mailto:zhut0002@ynnu.edu.cn) (T. Zhu)

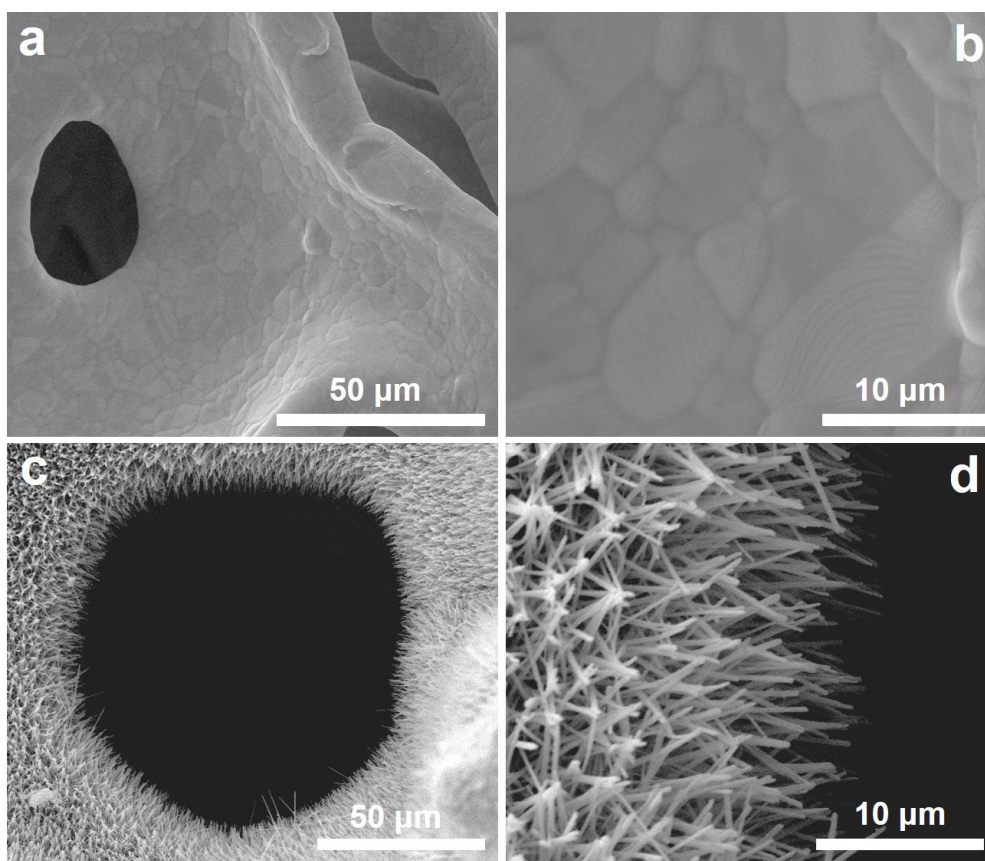

**Fig. S1.** SEM images of the bare Cu foam (CF, a and b), and CF supported  $\text{Cu}(\text{OH})_2$  NAs (c and d).

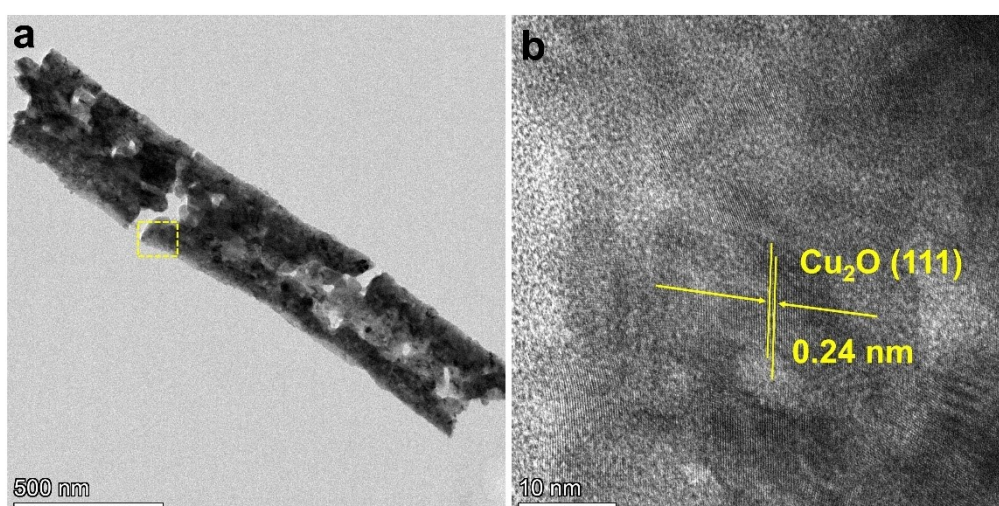

**Fig. S2.** TEM (a) and HR-TEM (b) images of the  $\text{Cu}_2\text{O}/\text{Fe}_2\text{O}_3$ -15 sample.

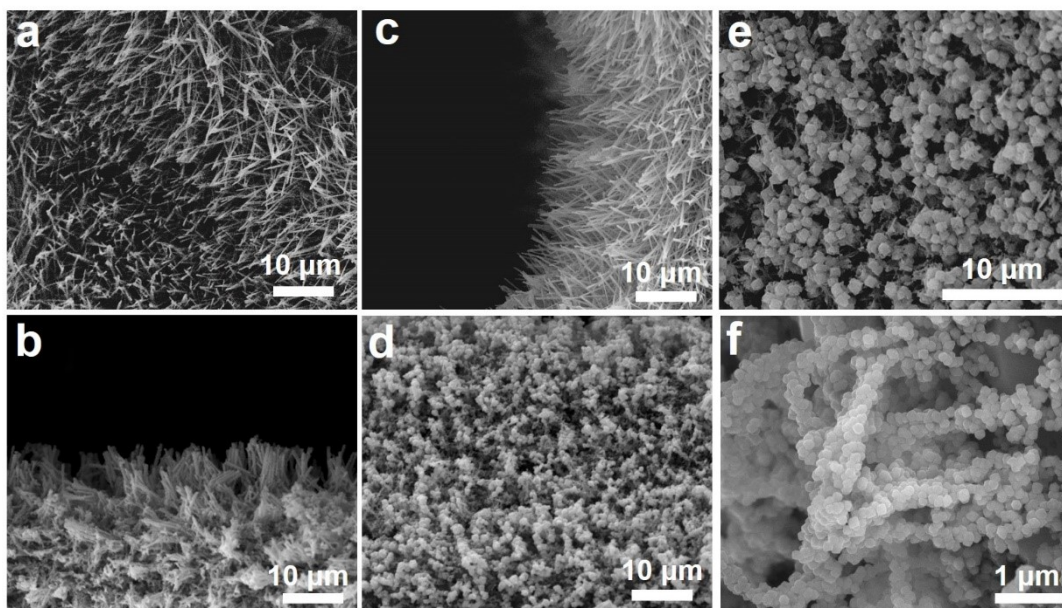

**Fig. S3.** SEM images of the Cu<sub>2</sub>O/Fe<sub>2</sub>O<sub>3</sub>-1 (a and b), Cu<sub>2</sub>O/Fe<sub>2</sub>O<sub>3</sub>-5 (c and d), and Cu<sub>2</sub>O/Fe<sub>2</sub>O<sub>3</sub>-30 (e and f) samples.

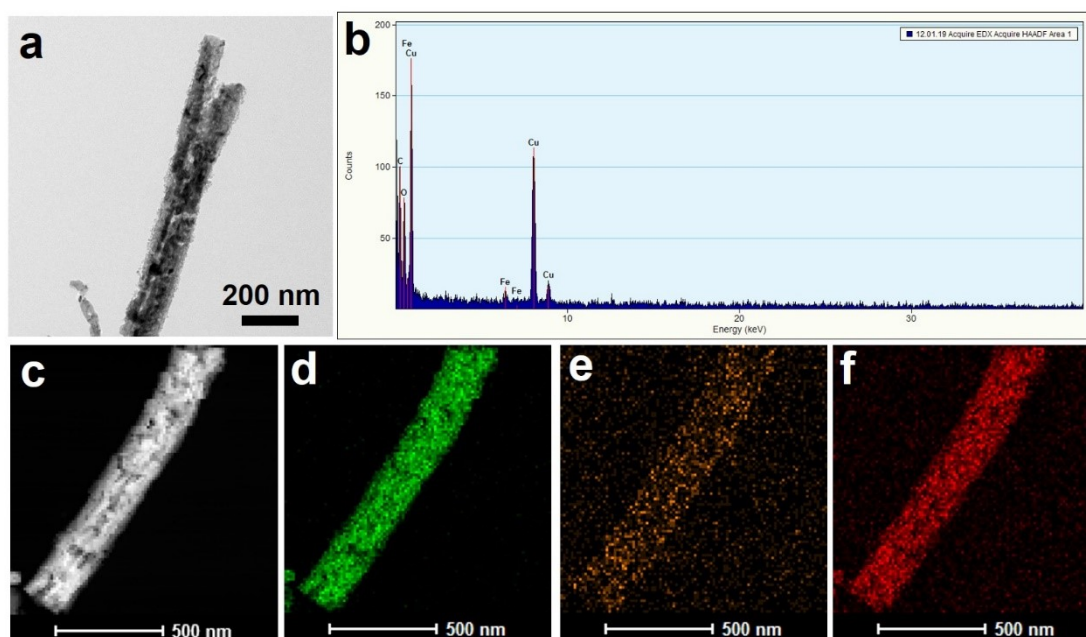

**Fig. S4.** TEM (a), EDX (b), HAADF (c), and elemental mappings (d-f: Cu, Fe, and O) of the Cu<sub>2</sub>O/Fe<sub>2</sub>O<sub>3</sub>-1 sample.



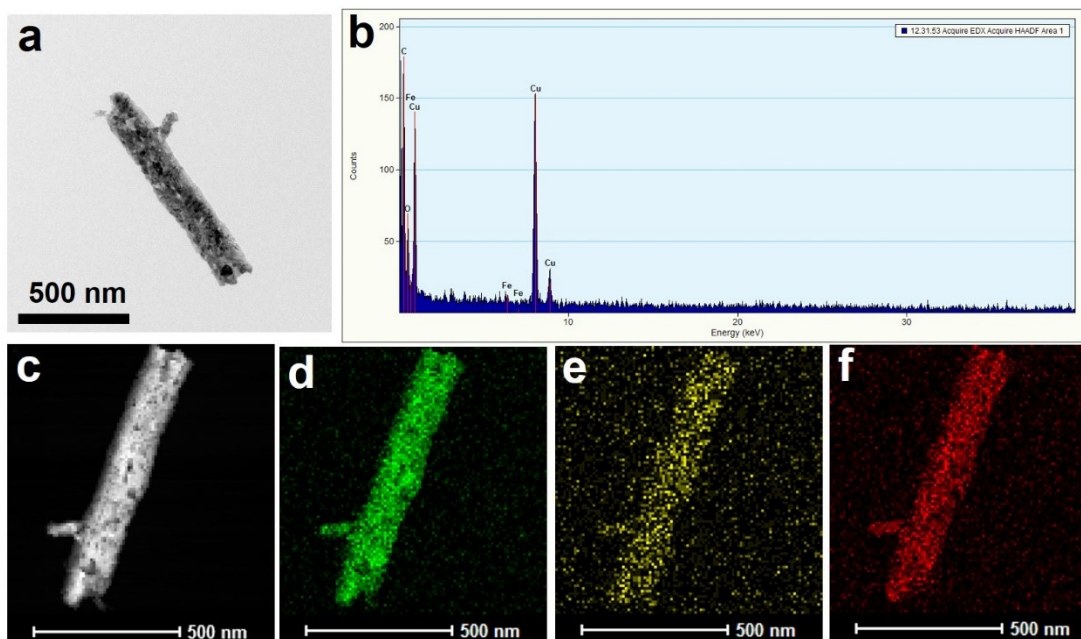

**Fig. S5.** TEM (a), EDX (b), HAADF (c), and elemental mappings (d-f: Cu, Fe, and O) of the  $\text{Cu}_2\text{O}/\text{Fe}_2\text{O}_3$ -5 sample.

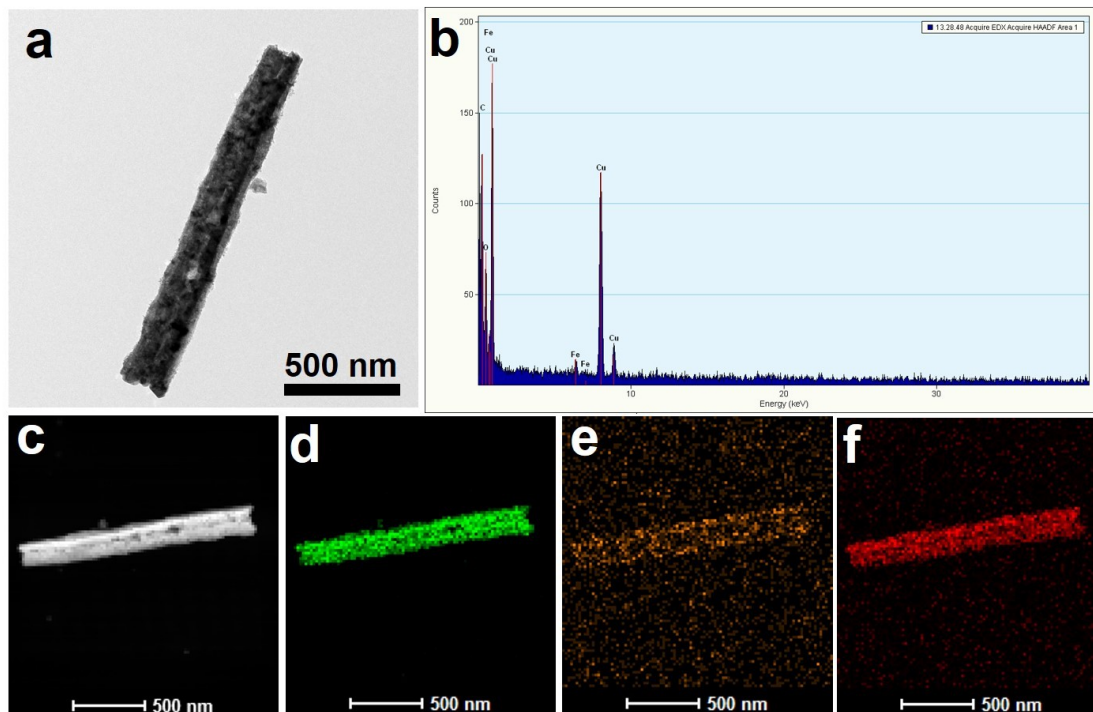

**Fig. S6.** TEM (a), EDX (b), HAADF (c), and elemental mappings (d-f: Cu, Fe, and O) of the  $\text{Cu}_2\text{O}/\text{Fe}_2\text{O}_3$ -30 sample.

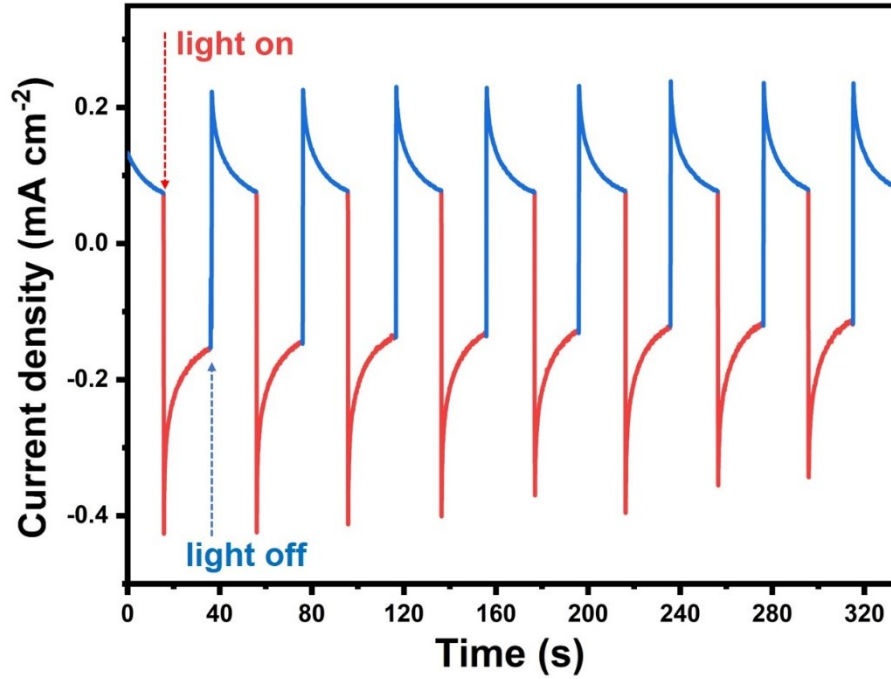

Fig. S7. Photocurrent response of the typical  $\text{Cu}_2\text{O}/\text{Fe}_2\text{O}_3$ -15 sample recorded at a bias of 0.1 V.

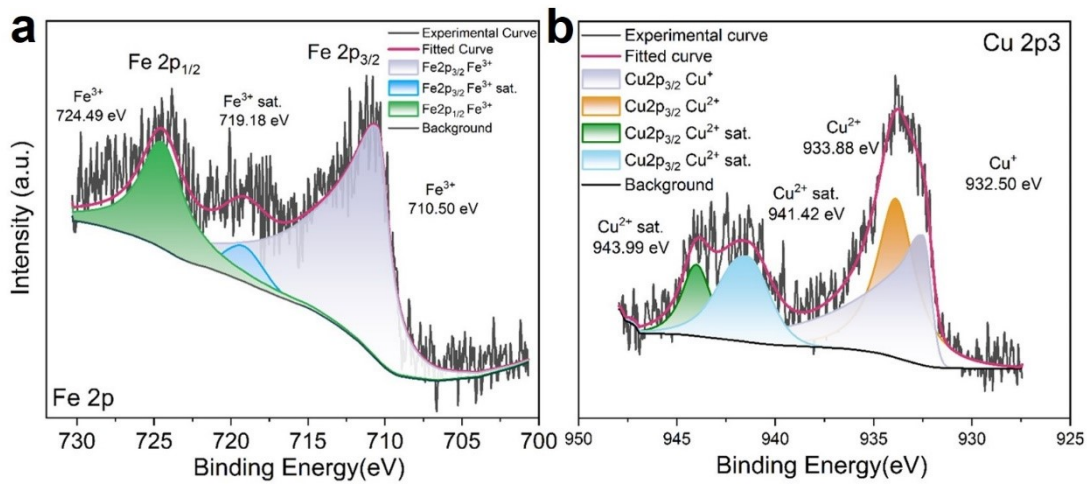

Fig. S8. XPS spectra of Fe 2p (a) and Cu 2p (b) of the typical  $\text{Cu}_2\text{O}/\text{Fe}_2\text{O}_3$ -15 sample.

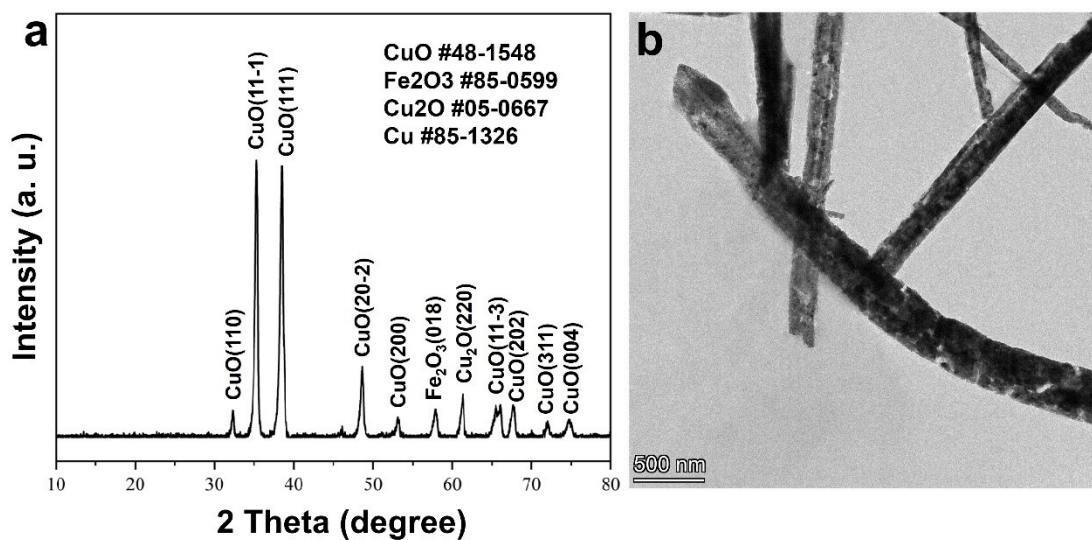

**Fig. S9.** XRD (a) and TEM (b) results of the Cu<sub>2</sub>O/Fe<sub>2</sub>O<sub>3</sub>-15 sample after photocatalytic tests for 10 times.

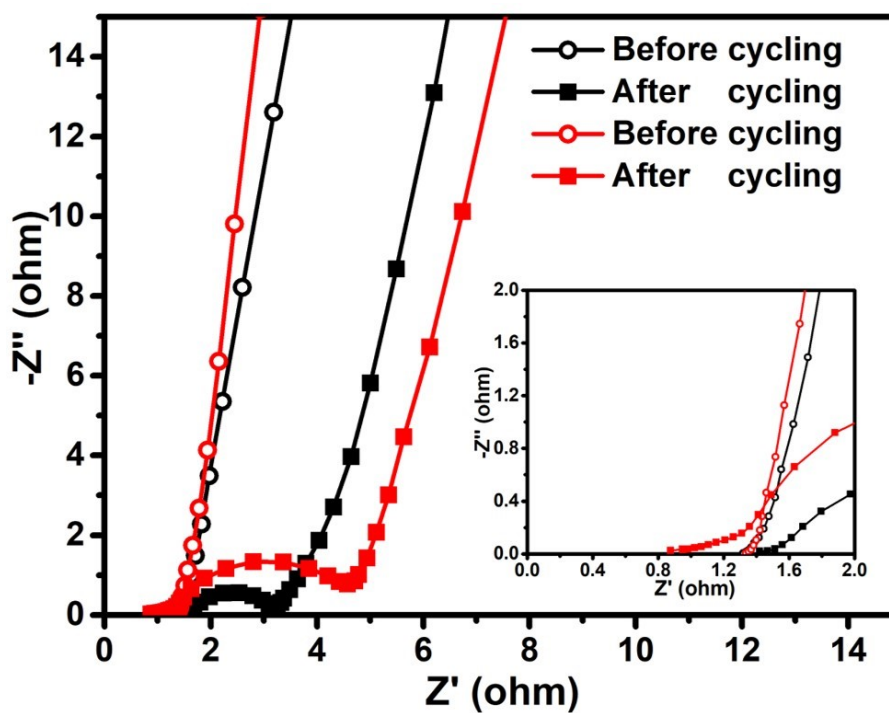

**Fig. S10.** EIS spectra of the typical Cu<sub>2</sub>O/Fe<sub>2</sub>O<sub>3</sub>-15 sample obtained before and after cycling performances with (red curves) or without (black curves) light irradiation for supercapacitors.

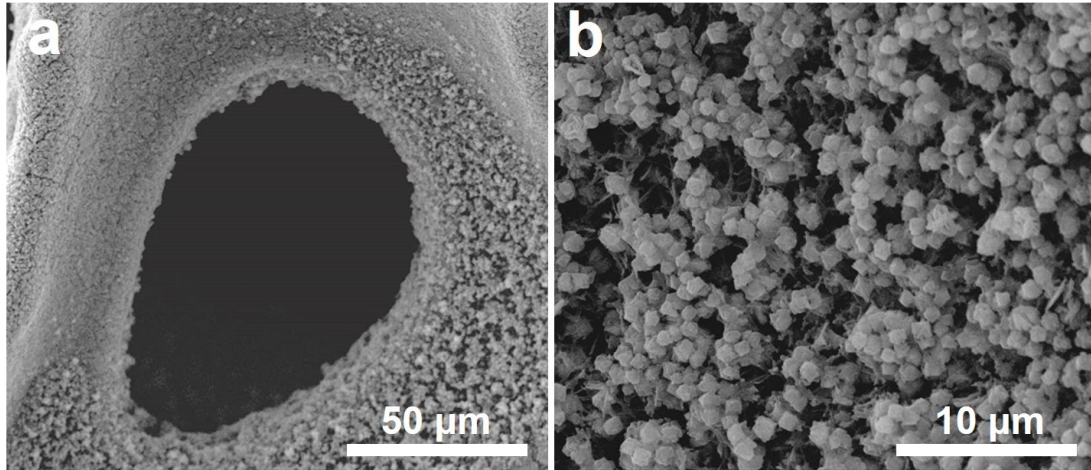

**Fig. S11.** SEM images of the  $\text{Cu}_2\text{O}/\text{Fe}_2\text{O}_3$ -15 sample after cycling tests for supercapacitors.
